# Supplementary material for: Highly selective detection of nitrotoluene based on novel lanthanide-containing ionic liquids
Source: Royal Society of Chemistry journal article supplement (doi:10.1039/c7ra06300h), 2017-01-01
Supplement: c7ra06300h1.pdf [file c7ra06300h1.pdf]

## Highly selective detection of nitrotoluene based on novel lanthanide-containing ionic liquids

Ling Zheng<sup>a</sup>, Li-Li Yang<sup>b</sup>, Nan-Nan Xing<sup>a</sup>, Yi Pan<sup>a</sup>, Hong-Xiang Ji<sup>a</sup>, Jie Wei<sup>a,\*</sup>, Wei Guan<sup>a,b\*</sup>

<sup>a</sup>College of Chemistry, Liaoning University, Shenyang 110036, PR China

<sup>b</sup>School of Environmental Science, Liaoning University, Shenyang 110036, PR China

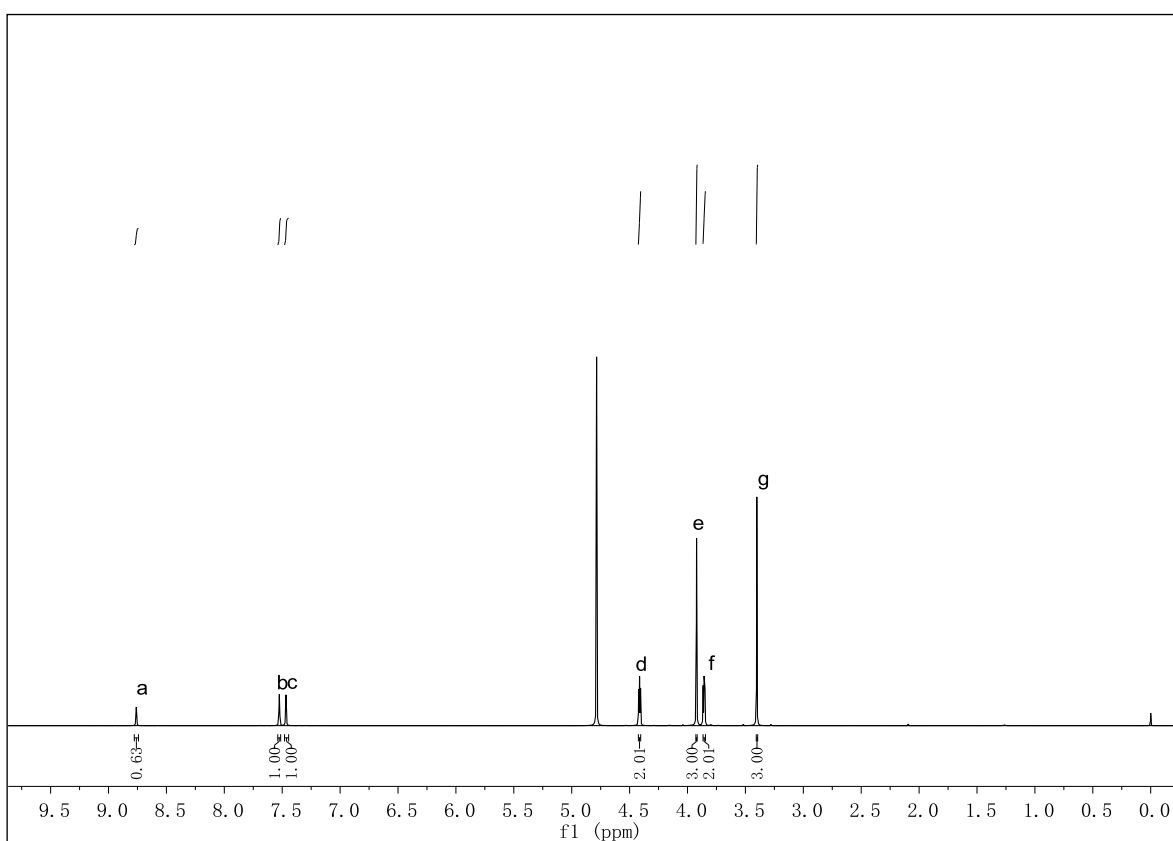

**Fig. S1** <sup>1</sup>H NMR spectrum  $\delta$ H (600 MHz, CD<sub>3</sub>OD) of [MOEMIm]Br.

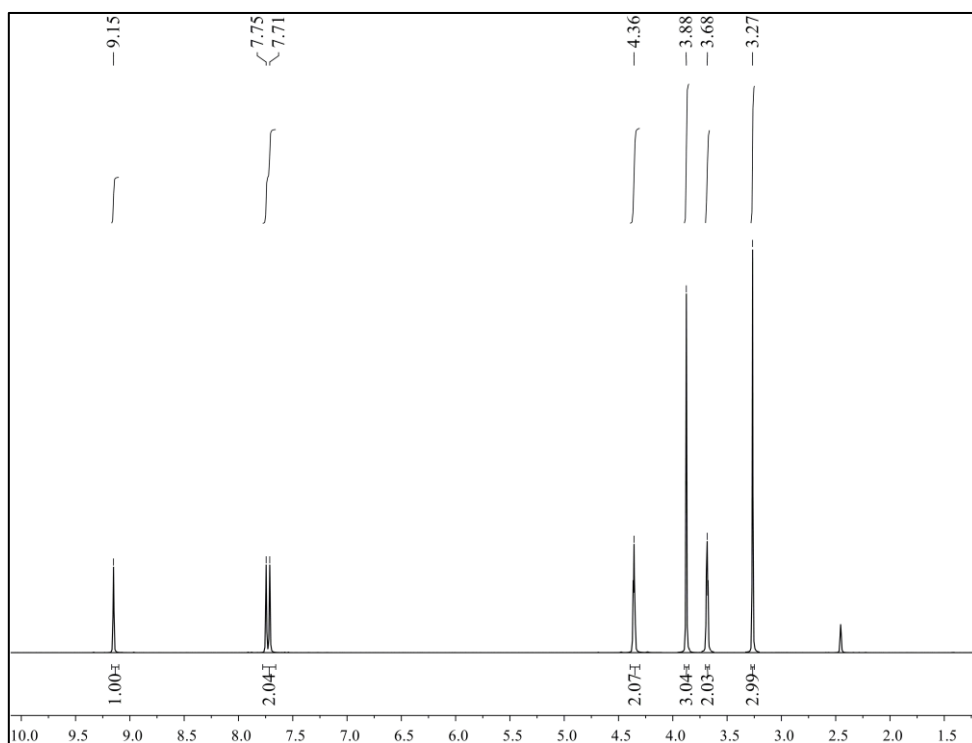

**Fig. S2**  $^1\text{H}$  NMR spectrum  $\delta\text{H}$  (600 MHz, DMSO) of  $[\text{MOEMIm}][\text{Eu}(\text{NO}_3)_4]$ .

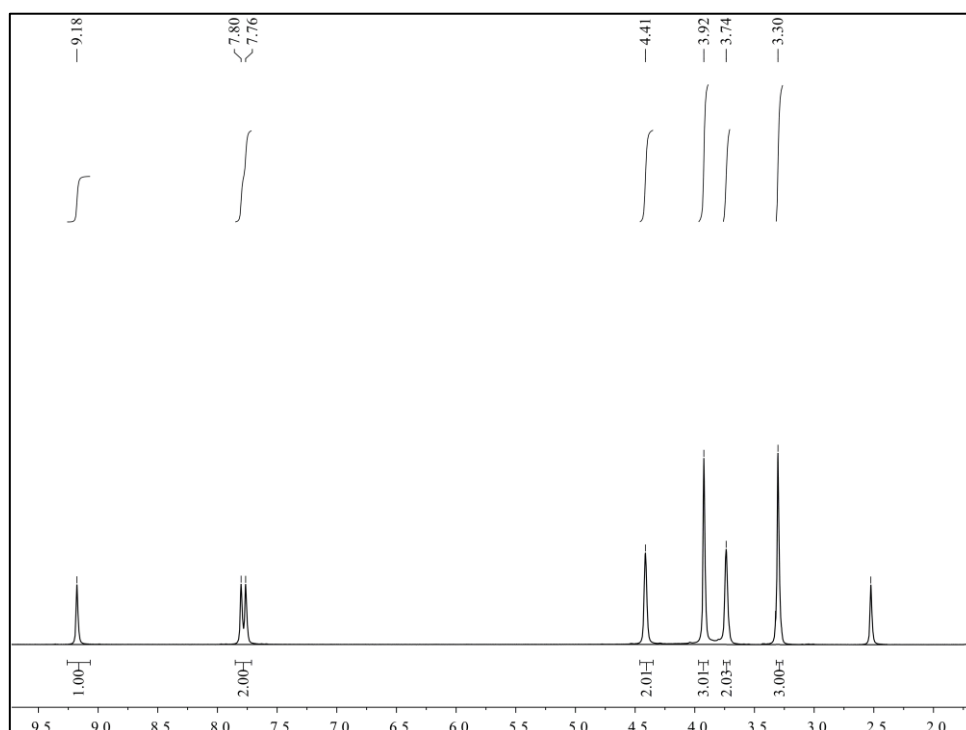

**Fig. S3**  $^1\text{H}$  NMR spectrum  $\delta\text{H}$  (600 MHz, DMSO) of  $[\text{MOEMIm}][\text{Dy}(\text{NO}_3)_4]$ .

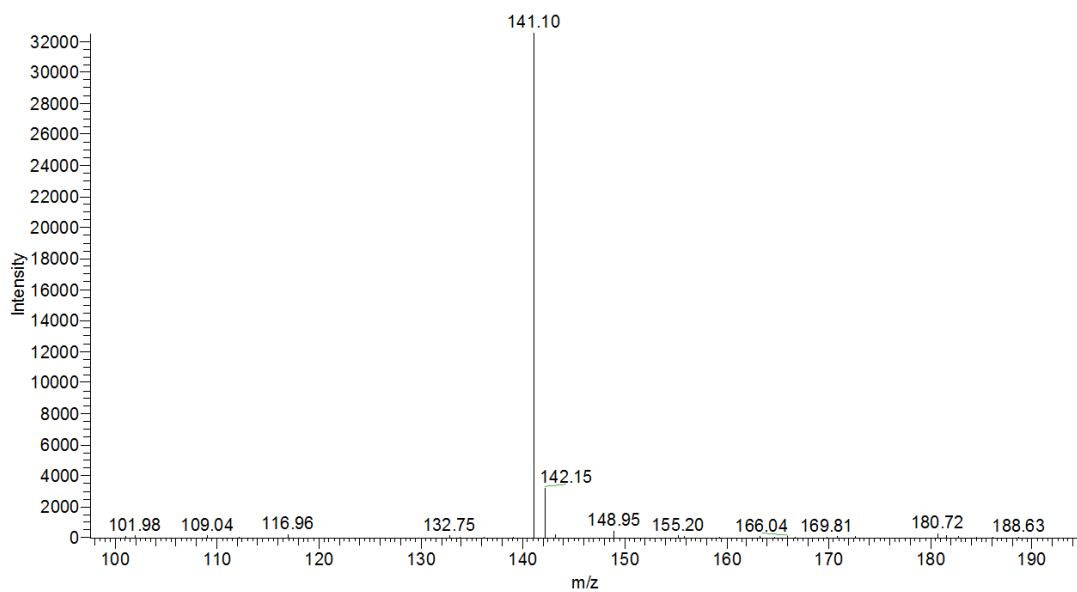

**Fig. S4** The cationic MS of [MOEMIm][Eu(NO<sub>3</sub>)<sub>4</sub>].

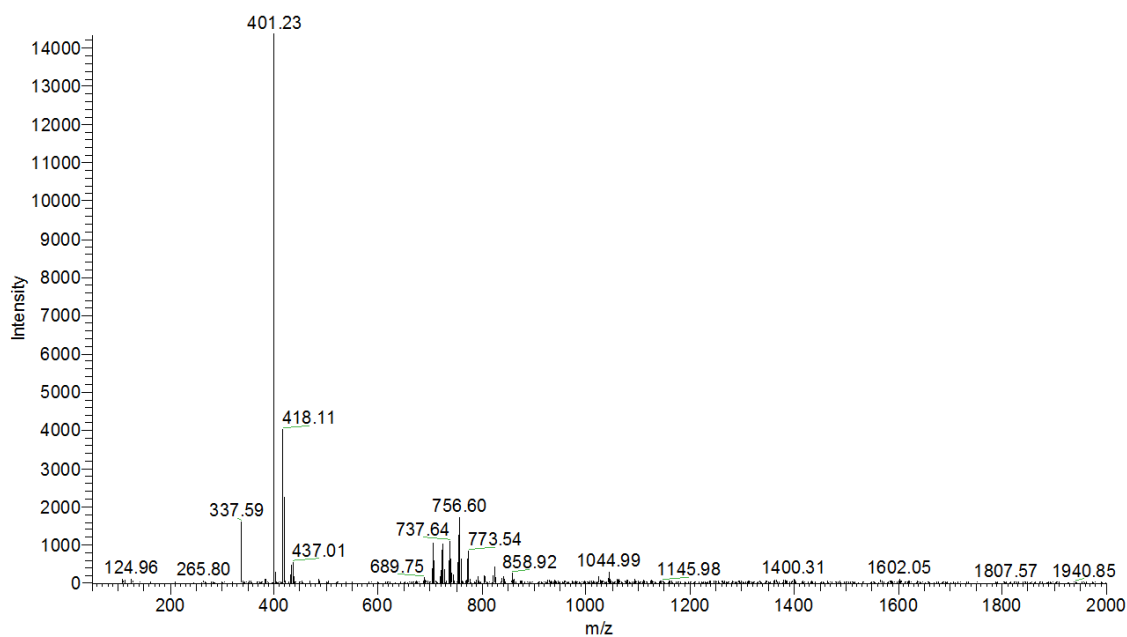

**Fig. S5** The anionic MS of [MOEMIm][Eu(NO<sub>3</sub>)<sub>4</sub>].

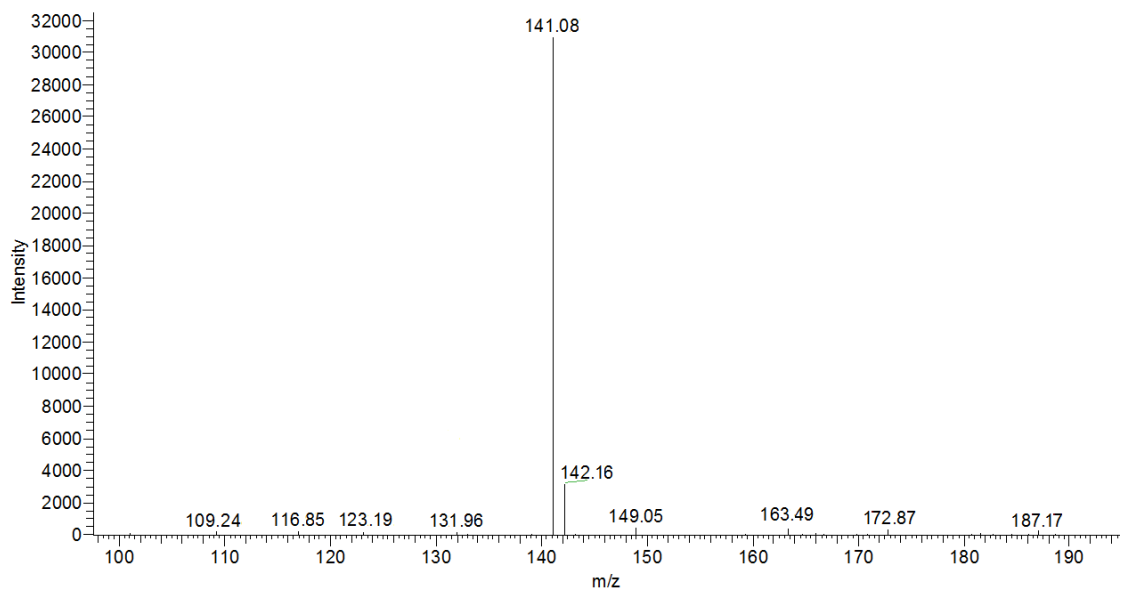

**Fig. S6** The cationic MS of [MOEMIm][Dy(NO<sub>3</sub>)<sub>4</sub>].

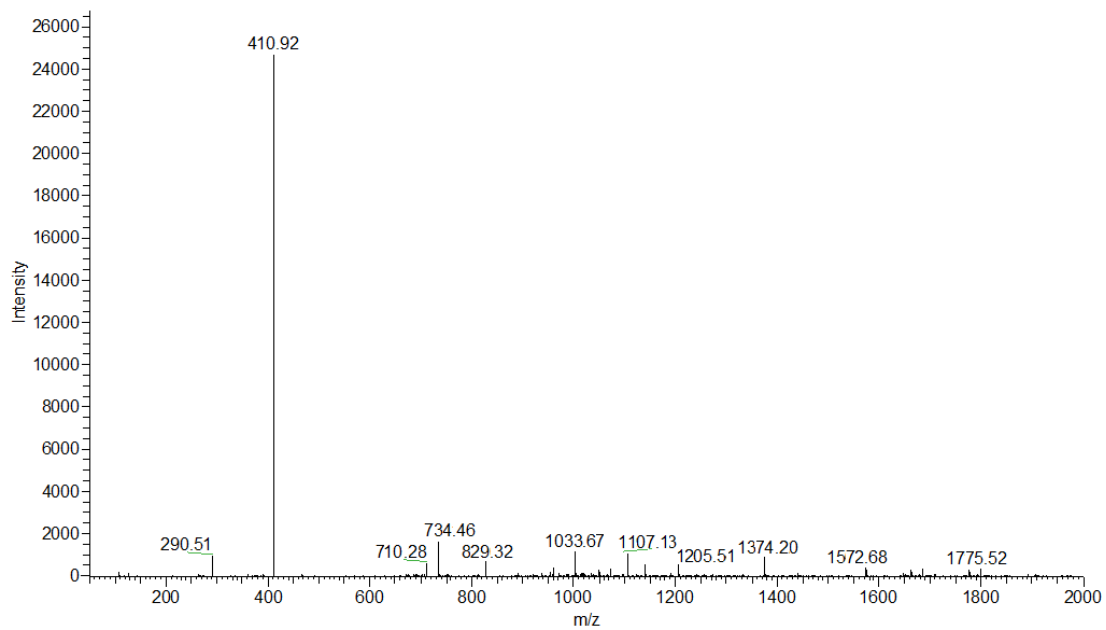

**Fig. S7** The anionic MS of [MOEMIm][Dy(NO<sub>3</sub>)<sub>4</sub>].

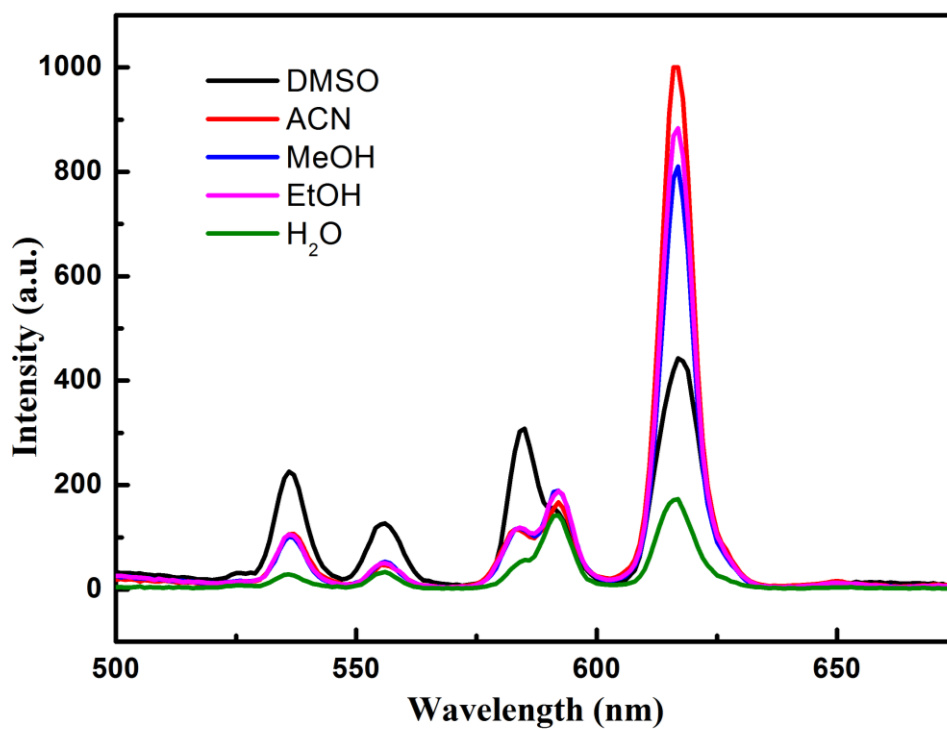

Fig. S8 The emission spectra of [MOEMIm][Eu(NO<sub>3</sub>)<sub>4</sub>] in the solvents of EtOH, DMSO, ACN, MeOH, H<sub>2</sub>O.

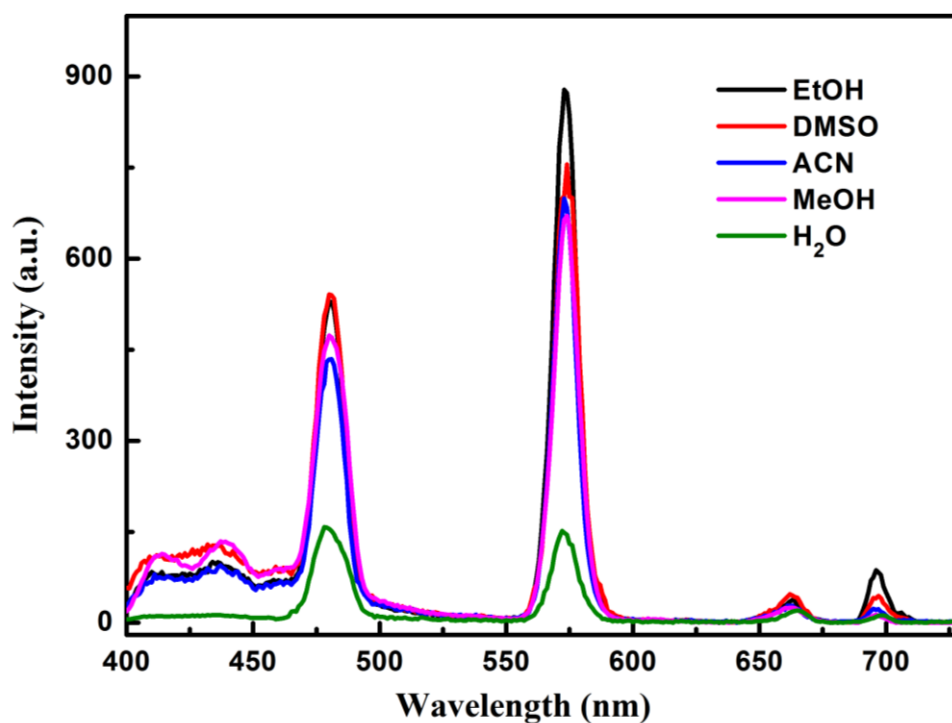

Fig. S9 The emission spectra of [MOEMIm][Dy(NO<sub>3</sub>)<sub>4</sub>] in the solvents of EtOH, DMSO, ACN, MeOH, H<sub>2</sub>O.

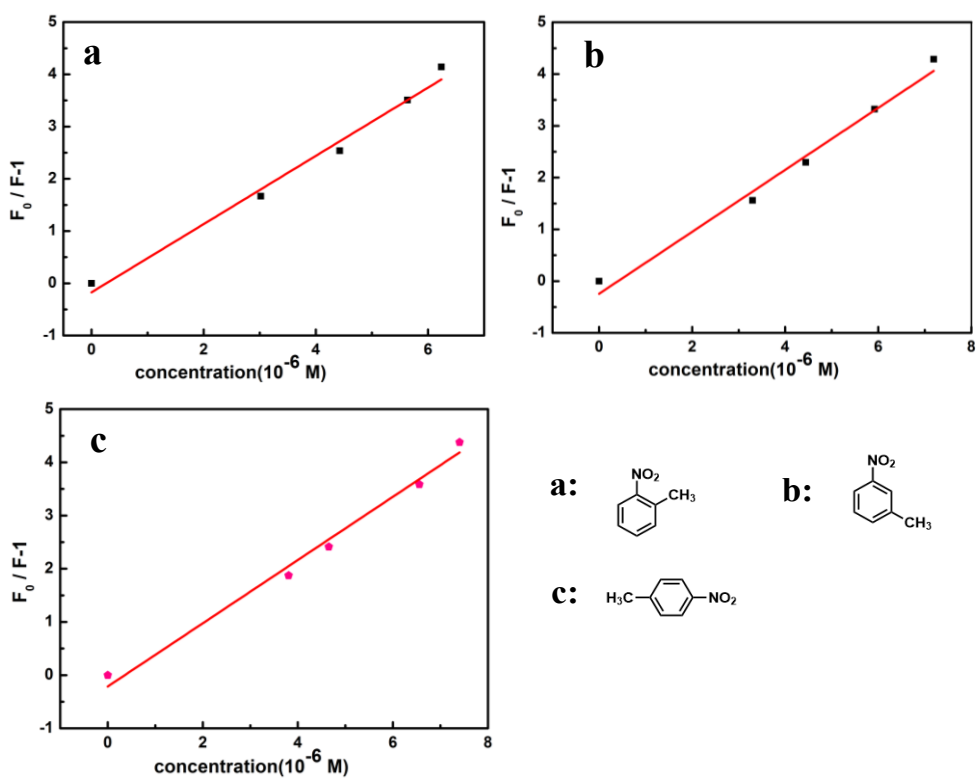

Fig. S10 Plot of  $F_0/F-1$  vs. concentration [Q] of *o*-(*m*-, *p*-)nitrotoluene for IL [MOEMIm][Eu(NO<sub>3</sub>)<sub>4</sub>].

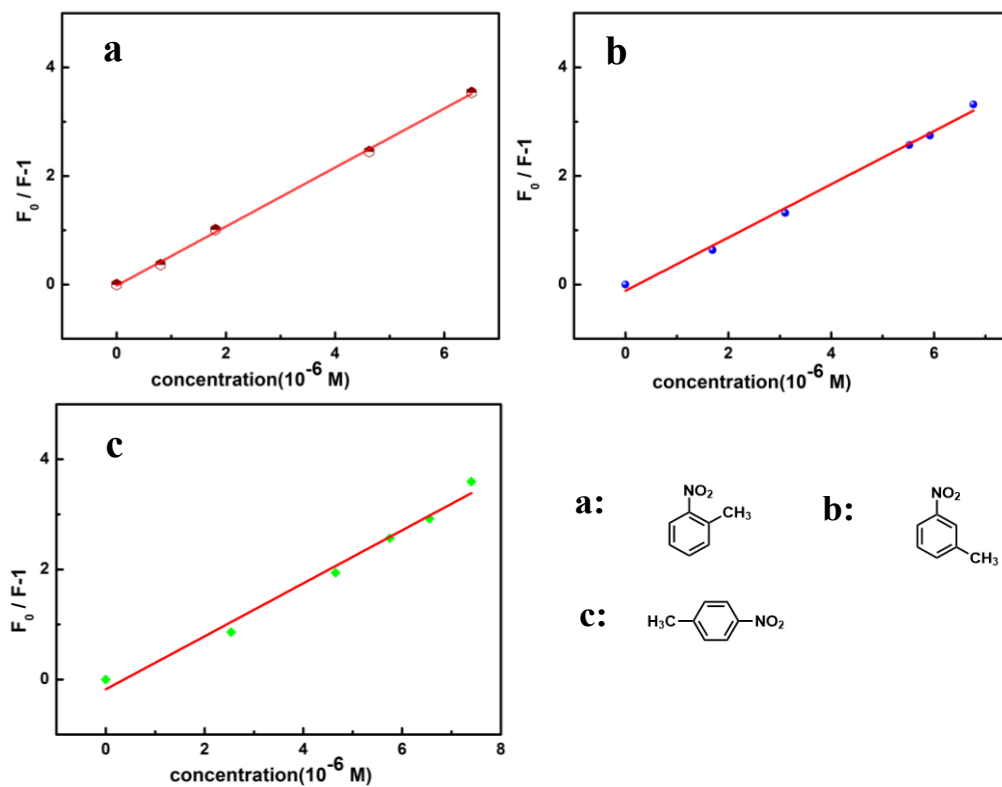

Fig. S11 Plot of  $F_0/F-1$  vs. concentration [Q] of *o*-(*m*-, *p*-)nitrotoluene for IL [MOEMIm][Dy(NO<sub>3</sub>)<sub>4</sub>].

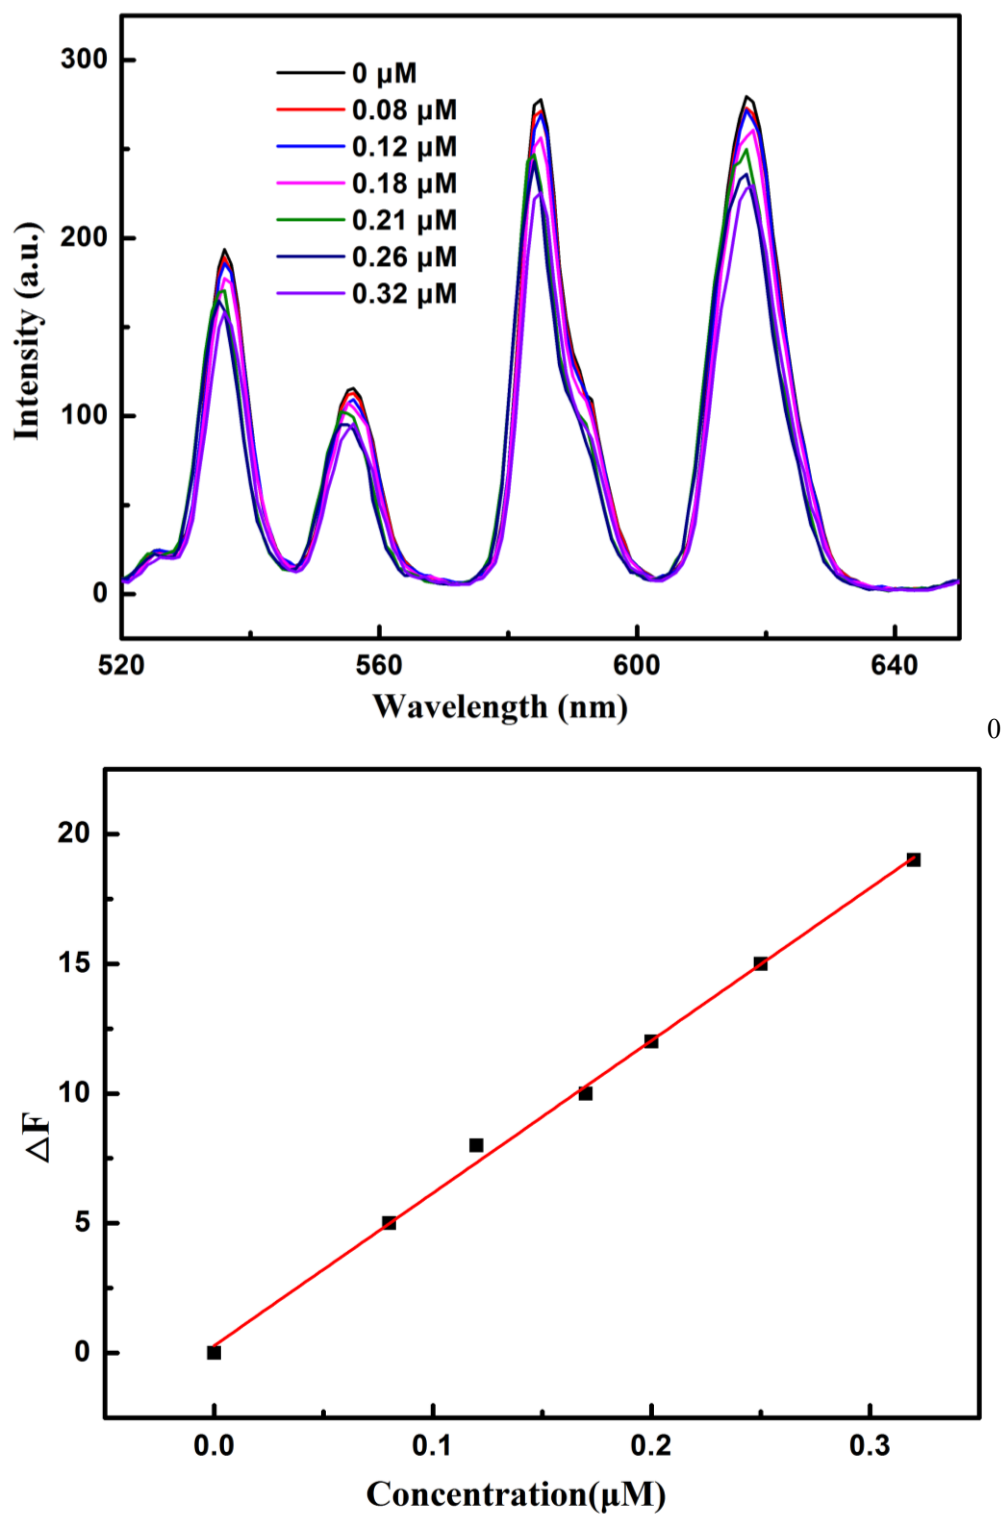

Fig. S12 Fluorescence spectra of Eu-IL exposed to various concentration of *p*-nitrotoluene.

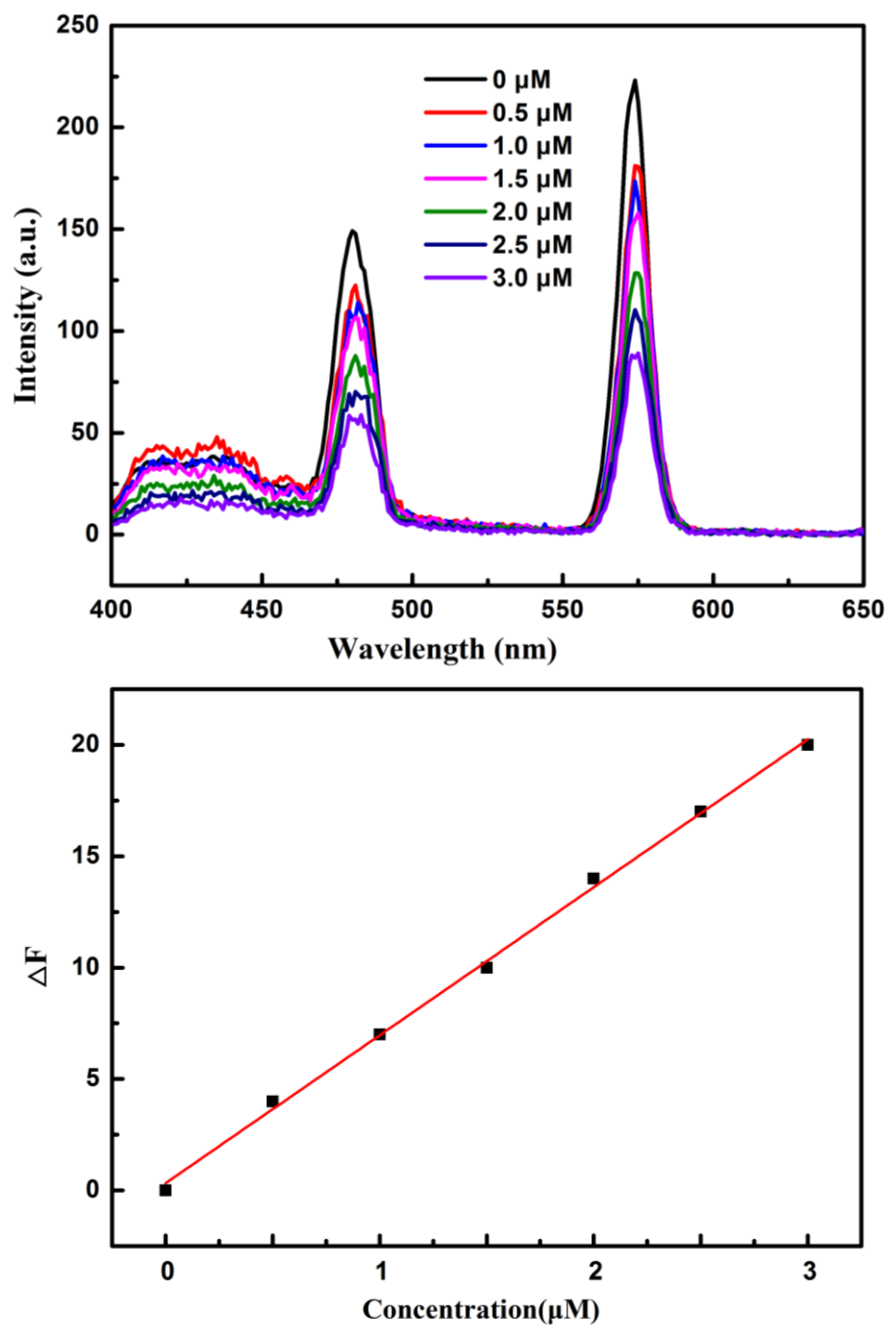

Fig. S13 Fluorescence spectra of Dy-IL exposed to various concentration of *p*-nitrotoluene.



Fig. S14 and Fig. S15 show series quenching efficiency of *o*-(*m*-, *p*-)nitrotoluen correspond to the data of Fig. 3 and Fig. 4 in the article.

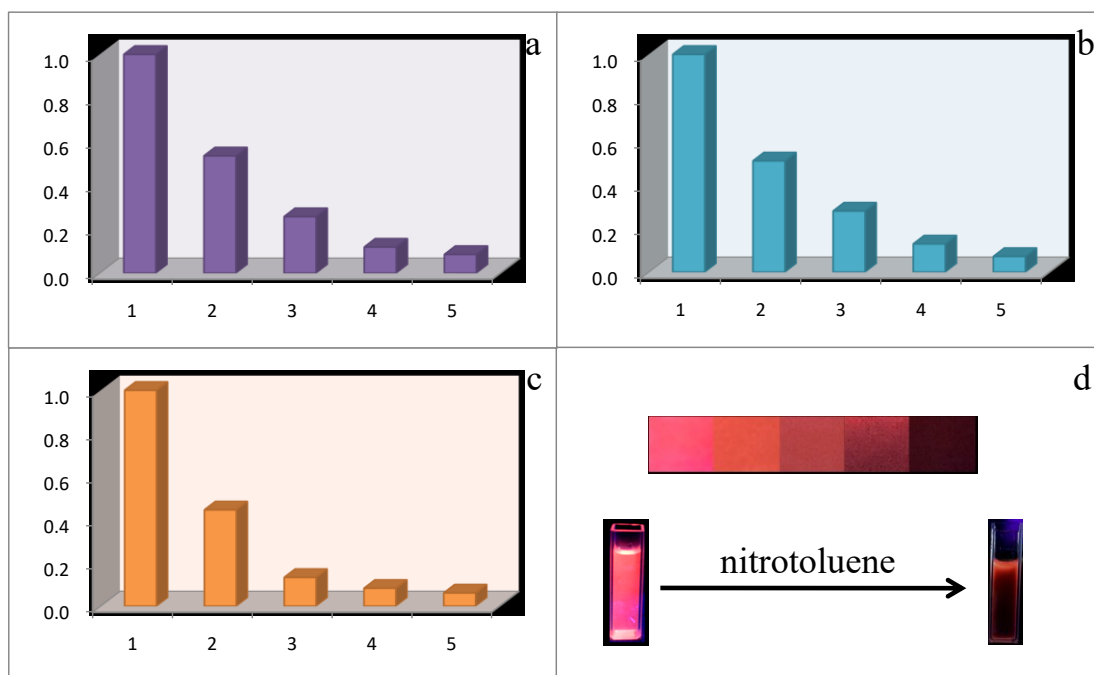

**Fig. S14** Fluorescence quenching efficiency of [MOEMIm][Eu(NO<sub>3</sub>)<sub>4</sub>] for certain concentration of *o*-(*m*-, *p*-)nitrotoluene.

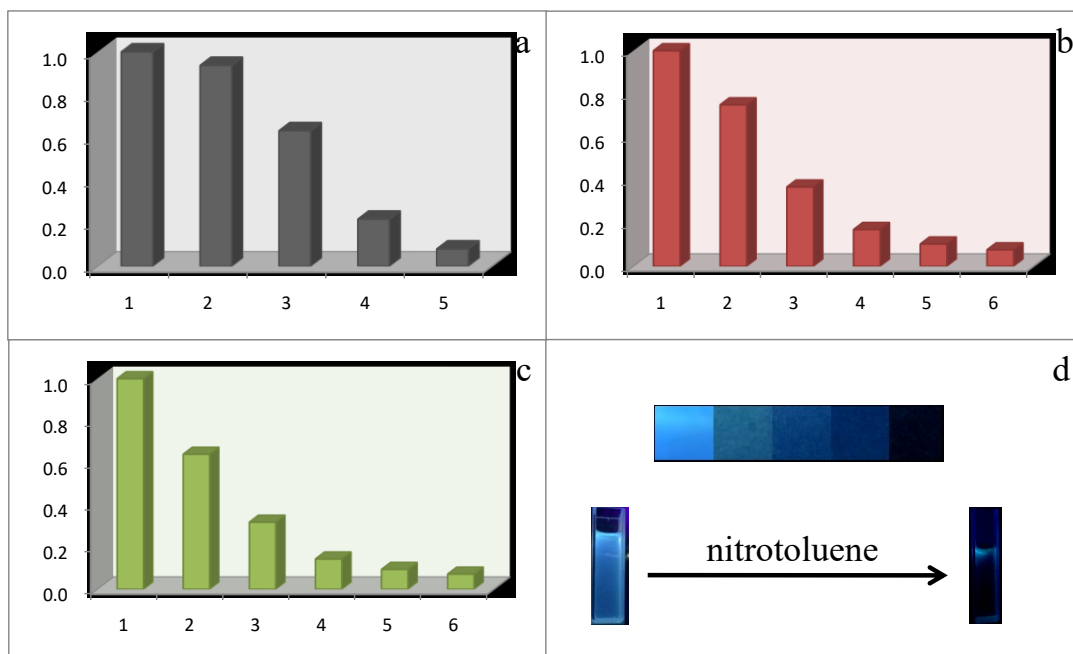

**Fig. S15** Fluorescence quenching efficiency of [MOEMIm][Dy(NO<sub>3</sub>)<sub>4</sub>] for certain concentration of *o*-(*m*-, *p*-)nitrotoluene.
